# Supplementary material for: Imparting CO2 reduction selectivity to ZnGa2O4 photocatalysts by crystallization from hetero nano assembly of amorphous-like metal hydroxides
Source: RSC Adv. 2020 Feb 25;10(14):8066–73. doi: 10.1039/d0ra00710b (PMC9049919; doi:10.1039/d0ra00710b)
Supplement: RA-010-D0RA00710B-s001 [file RA-010-D0RA00710B-s001.pdf]

## Supporting Information

Imparting CO<sub>2</sub> reduction selectivity to ZnGa<sub>2</sub>O<sub>4</sub> photocatalysts by crystallization from hetero nano assembly of amorphous-like metal hydroxides.

*Masanori Takemoto, Yasuaki Tokudome\*, Soichi Kikkawa, Kentaro Teramura\*, Tsunehiro Tanaka, Hidenobu Murata, Atsushi Nakahira, Kenji Okada and Masahide Takahashi*

\*corresponding authors

|                         |           |
|-------------------------|-----------|
| <b>Experimental</b>     | <b>2</b>  |
| <b>Characterization</b> | <b>3</b>  |
| <b>Figure S1</b>        | <b>4</b>  |
| <b>Figure S2</b>        | <b>5</b>  |
| <b>Figure S3</b>        | <b>6</b>  |
| <b>Figure S4</b>        | <b>7</b>  |
| <b>Figure S5</b>        | <b>8</b>  |
| <b>Figure S6</b>        | <b>9</b>  |
| <b>Figure S7</b>        | <b>10</b> |
| <b>Figure S8</b>        | <b>11</b> |
| <b>Figure S9</b>        | <b>12</b> |
| <b>Table S1</b>         | <b>13</b> |
| <b>Table S2</b>         | <b>13</b> |
| <b>Reference</b>        | <b>14</b> |

## Experimental

### *Solid state reaction*

The synthesis was performed according to a previous-reported  $\text{ZnGa}_2\text{O}_4$  synthesis.<sup>1</sup>  $\text{ZnO}$  (0.65 g),  $\text{Ga}_2\text{O}_3$  (1.50 g) and deionized water (2.5 mL) were mixed in a mortar for 30 min to yield homogeneous slurry. The slurry was dried in oven at 80 °C for 15 min. 1 mL of deionized water was added to the dried powder and the slurry was mixed for 30 min. Then, the slurry was dried in oven at 80 °C for 1 h, and calcined at 700 °C or 850 °C for 12 h.

## Characterization

### *Electric conductivity measurement*

The total amount of ionic species ( $\text{Zn}^{2+} + \text{Ga}^{3+}$ ) consumed to yield metal hydroxide through the alkalization by epoxide ring-opening was calculated from an electric conductivity measurement according to the previous report.<sup>2</sup> The solution at a molar ratio of  $\text{Zn}(\text{NO}_3)_2 \cdot 6\text{H}_2\text{O}$ :  $\text{Ga}(\text{NO}_3)_3 \cdot n\text{H}_2\text{O}$ : ultra-pure water: ethanol: PO = 1: 2: 134: 66: 45 was measured. The data was collected at 24 h after the addition of PO to the precursor solution.

### *Calculation of crystalline size of $\text{ZnGa}_2\text{O}_4$ catalysts*

Crystallite size of  $\text{ZnGa}_2\text{O}_4$  was calculated using Scherrer's equation by reference to the previous reports,<sup>3,4</sup>  $D = K\lambda/(B\cos\theta)$ . Here,  $K$  is a constant (0.9),  $\lambda$  is the wavelength of  $\text{CuK}\alpha$  radiation (0.154 nm),  $B$  is the Full Width of Half Maximum (FWHM) of the diffraction peak centered at  $35.73^\circ$ , and  $\theta$  is Bragg's angle.

### *X-ray photoelectron spectroscopy (XPS) of $\text{ZnGa}_2\text{O}_4$ catalysts*

Powderly sample was molded into a pellet ( $\phi = 7$  mm). The pellet was mounted on the sample holder by using conductive carbon tape. All the binding energies were refereced to the C 1s peak at 284.8 eV of the surface adventitious carbon. The surface atomic ratio (Zn/Ga) was calculated from the integrated intensity of Zn 2p<sub>3/2</sub> and Ga 2p<sub>3/2</sub> spectra by using corresponding relative sensitivity factors.

(a) Precursory gel

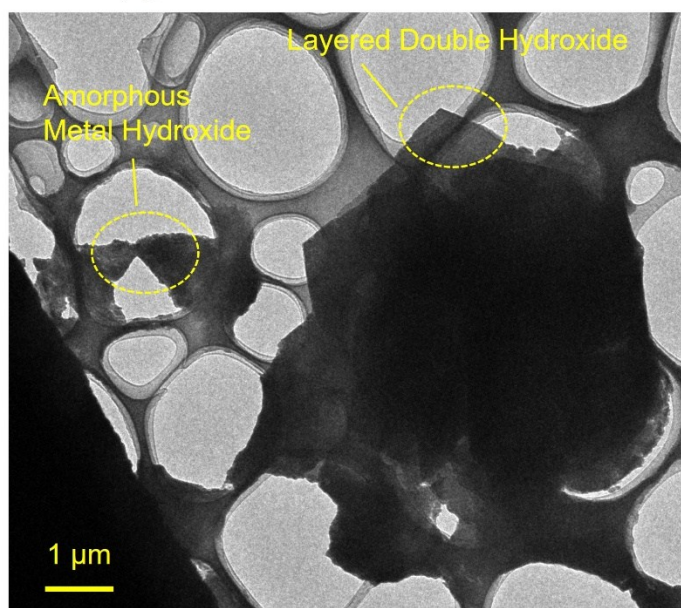

(b) Layered Double Hydroxide

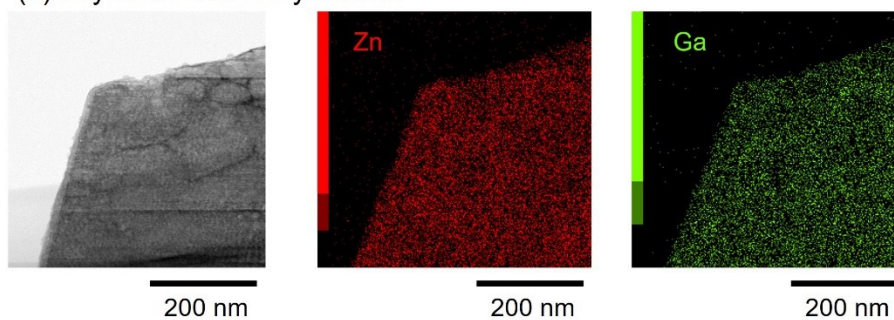

(c) Amorphous Metal Hydroxide

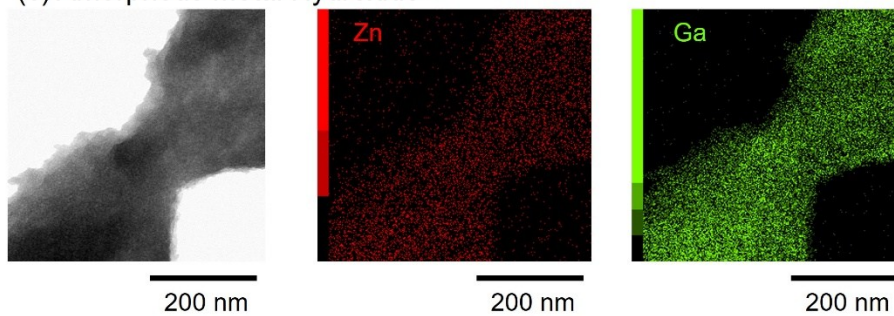

**Figure S1 (a) FE-TEM image of precursory wet gel obtained from an aqueous solution of  $\text{Zn}(\text{NO}_3)_2 \cdot 6\text{H}_2\text{O}$  and  $\text{Ga}(\text{NO}_3)_3 \cdot n\text{H}_2\text{O}$  under a highly supersaturated condition induced by epoxide-mediated alkalization. Enlarged views and EDS mappings of Zn and Ga of (b) Layered Double hydroxide and (c) Amorphous Metal Hydroxide as shown in Fig. S1(a).**

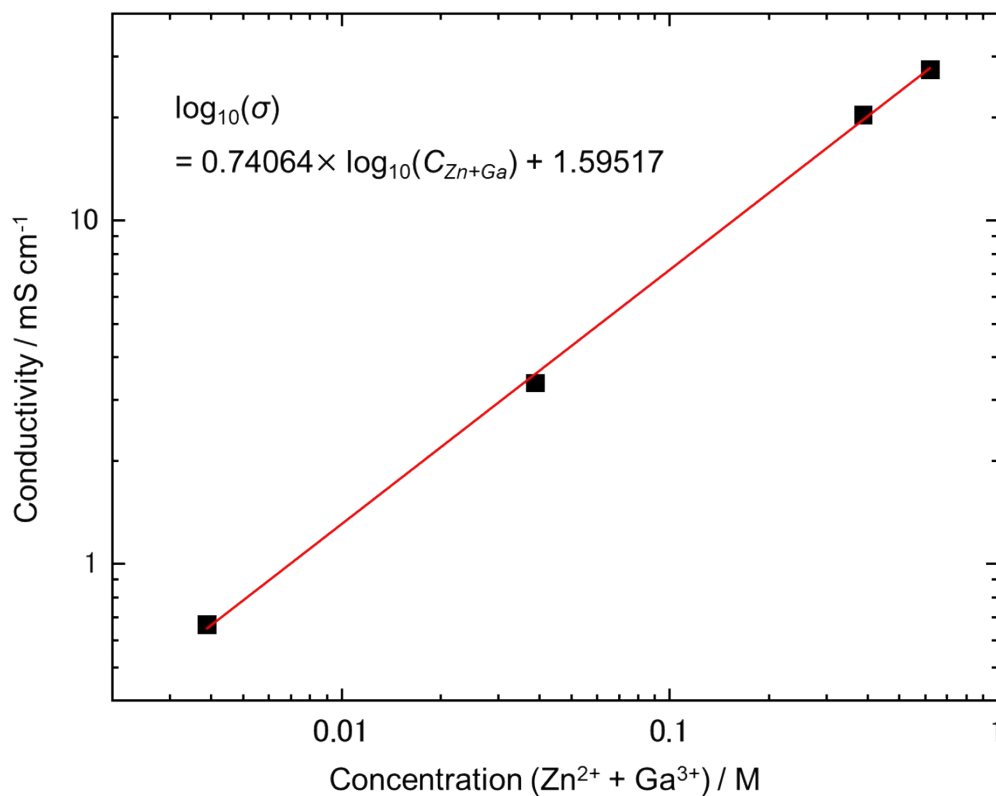

**Figure S2 Calibration curve for determining the amount of consumed ionic species during the precipitation of hydroxides.** The calibration is  $\log_{10}(\sigma) = 0.74064 \times \log_{10}(C_{Zn+Ga}) + 1.59517$ , where  $\sigma$  and  $C_{Zn+Ga}$  are the conductivity of the solution and the total concentration of metal ions (Zn<sup>2+</sup> + Ga<sup>3+</sup>), respectively. The value of conductivity of the reacting solution at 24 h is 2.42 mS cm<sup>-1</sup>, corresponding to 0.0231 M, where 96.3% of ionic species are consumed to precipitate hydroxides.

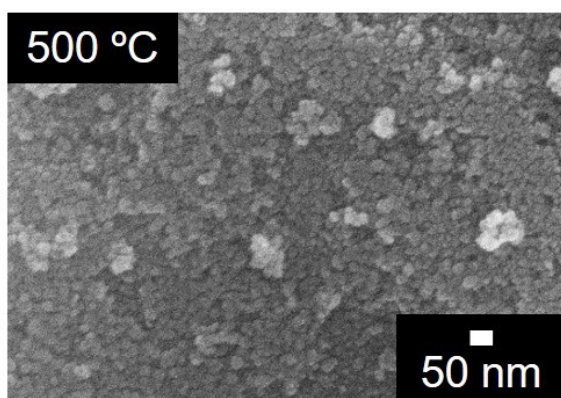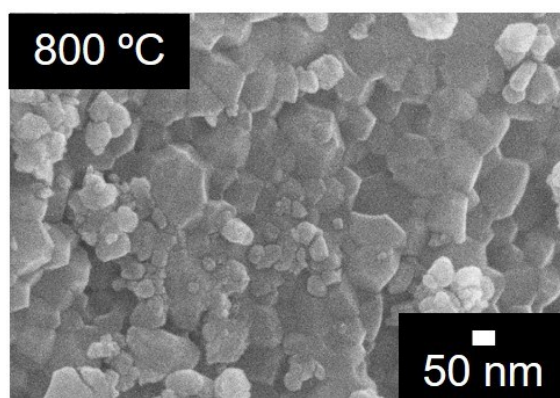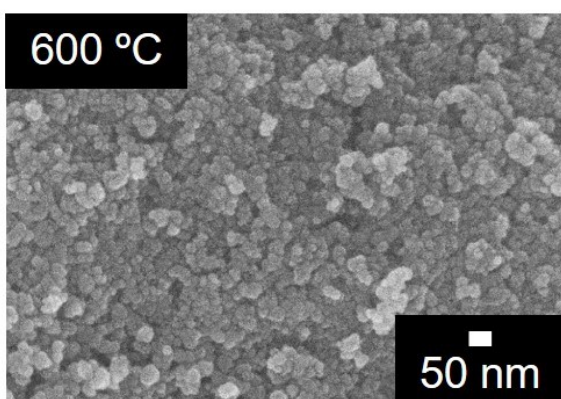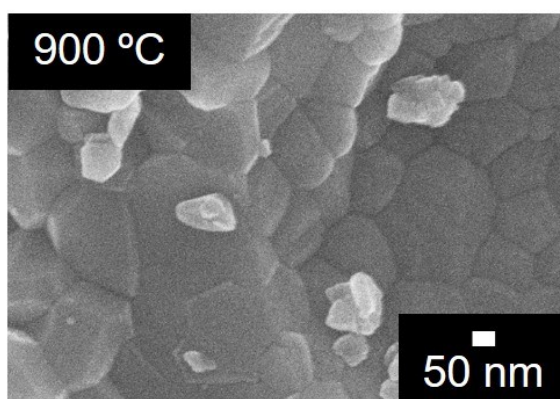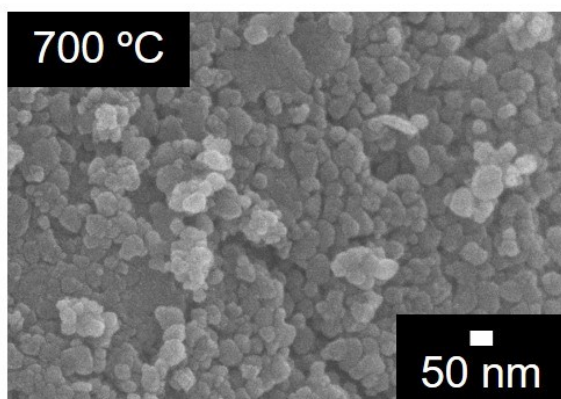

**Figure S3 SEM images of AMH-derived  $\text{ZnGa}_2\text{O}_4$  catalysts.**

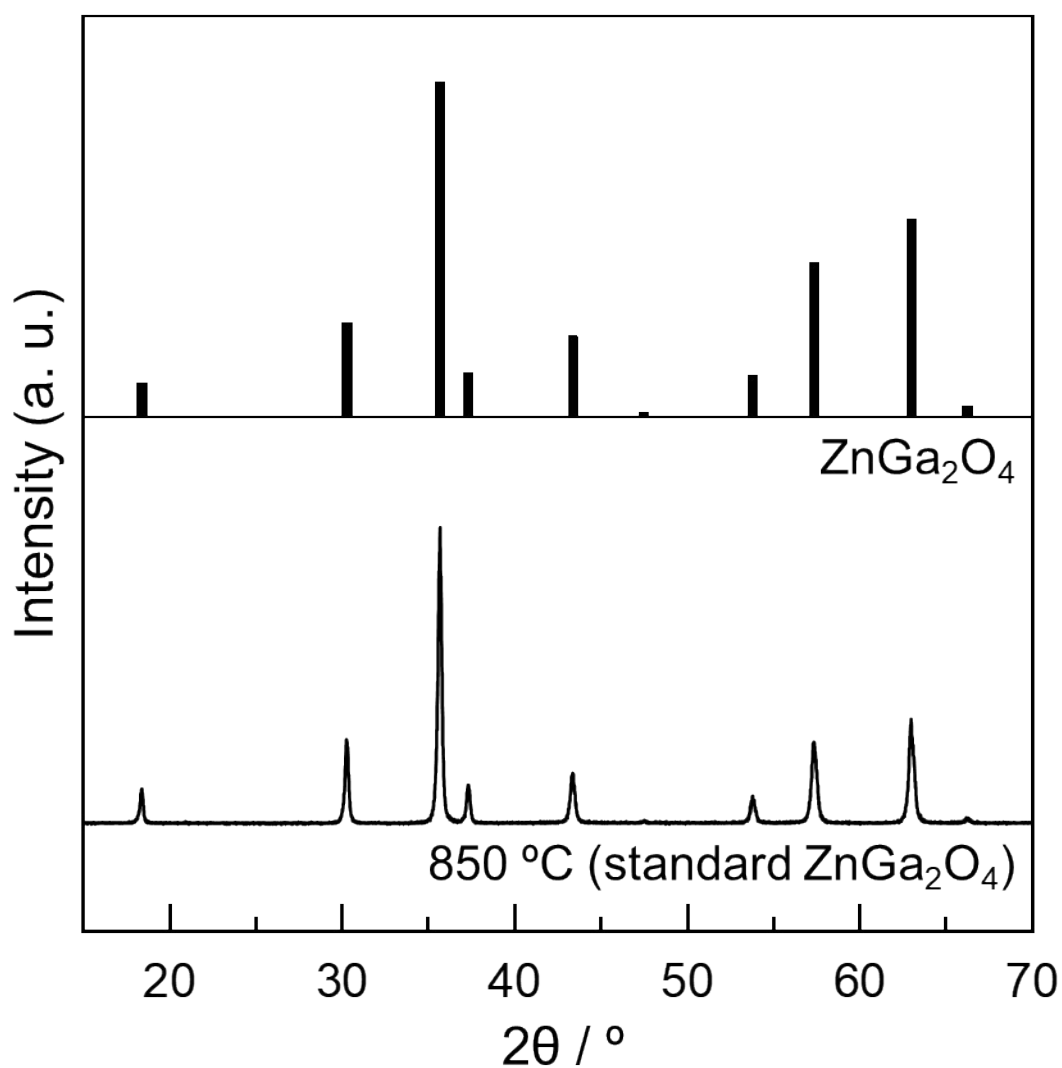

**Figure S4** PXRD patterns of  $\text{ZnGa}_2\text{O}_4$  prepared from a mixture of  $\text{ZnO}$  and  $\text{Ga}_2\text{O}_3$  powders by calcination at  $850^\circ\text{C}$ .  $\text{ZnGa}_2\text{O}_4$  obtained as a single phase was named as “standard  $\text{ZnGa}_2\text{O}_4$ ”. Crystallite size and BET specific surface area of standard  $\text{ZnGa}_2\text{O}_4$  are 29 nm and  $1.3\text{ m}^2\text{ g}^{-1}$ , respectively.

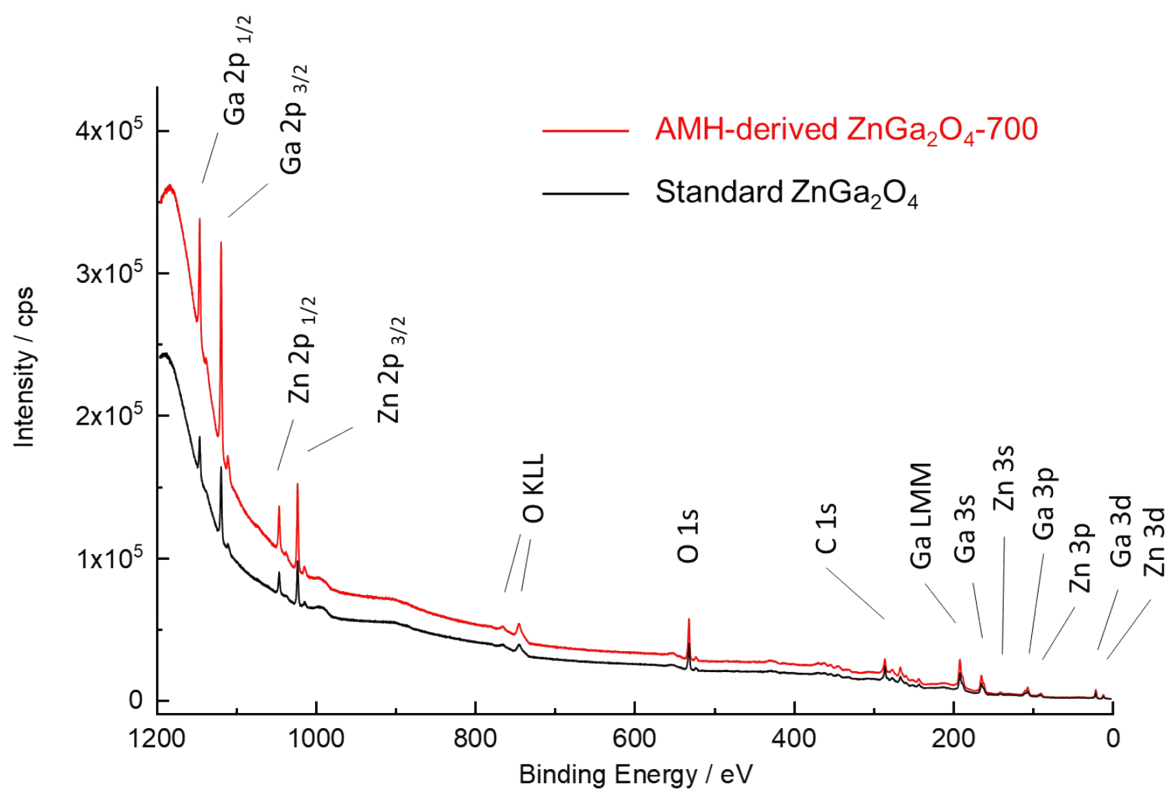

**Figure S5 Wide scan XPS spectra of AMH-derived  $\text{ZnGa}_2\text{O}_4\text{-700}$  (red line) and standard  $\text{ZnGa}_2\text{O}_4$  (black line).**

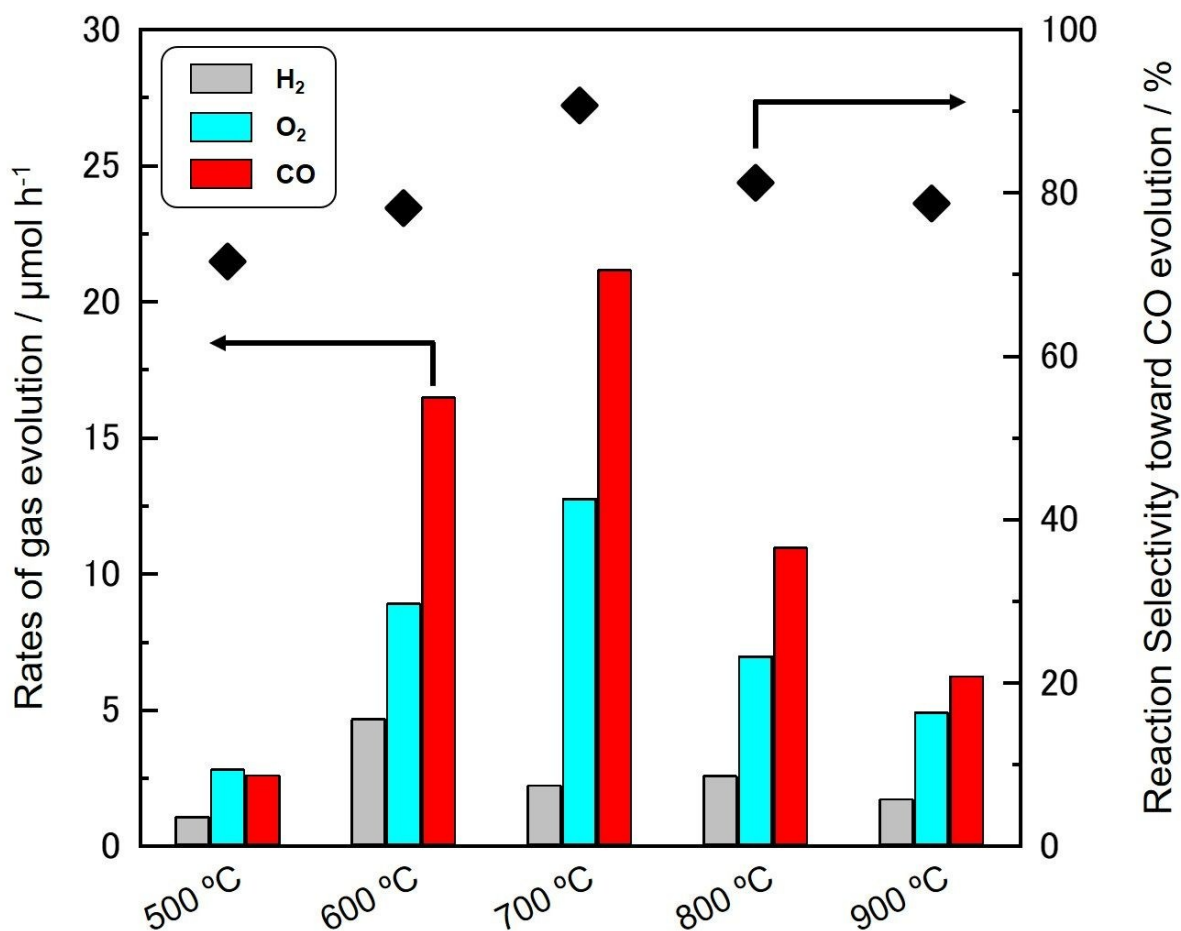

**Figure S6** Rates of  $\text{H}_2$  (grey),  $\text{O}_2$  (sky blue), and  $\text{CO}$  (red) evolution and reaction selectivity toward  $\text{CO}$  evolution (◆) over Ag-loaded AMH-derived  $\text{ZnGa}_2\text{O}_4$  prepared by calcination at various temperatures for 12 h; the loading amount of Ag co-catalyst: 1.0wt%.

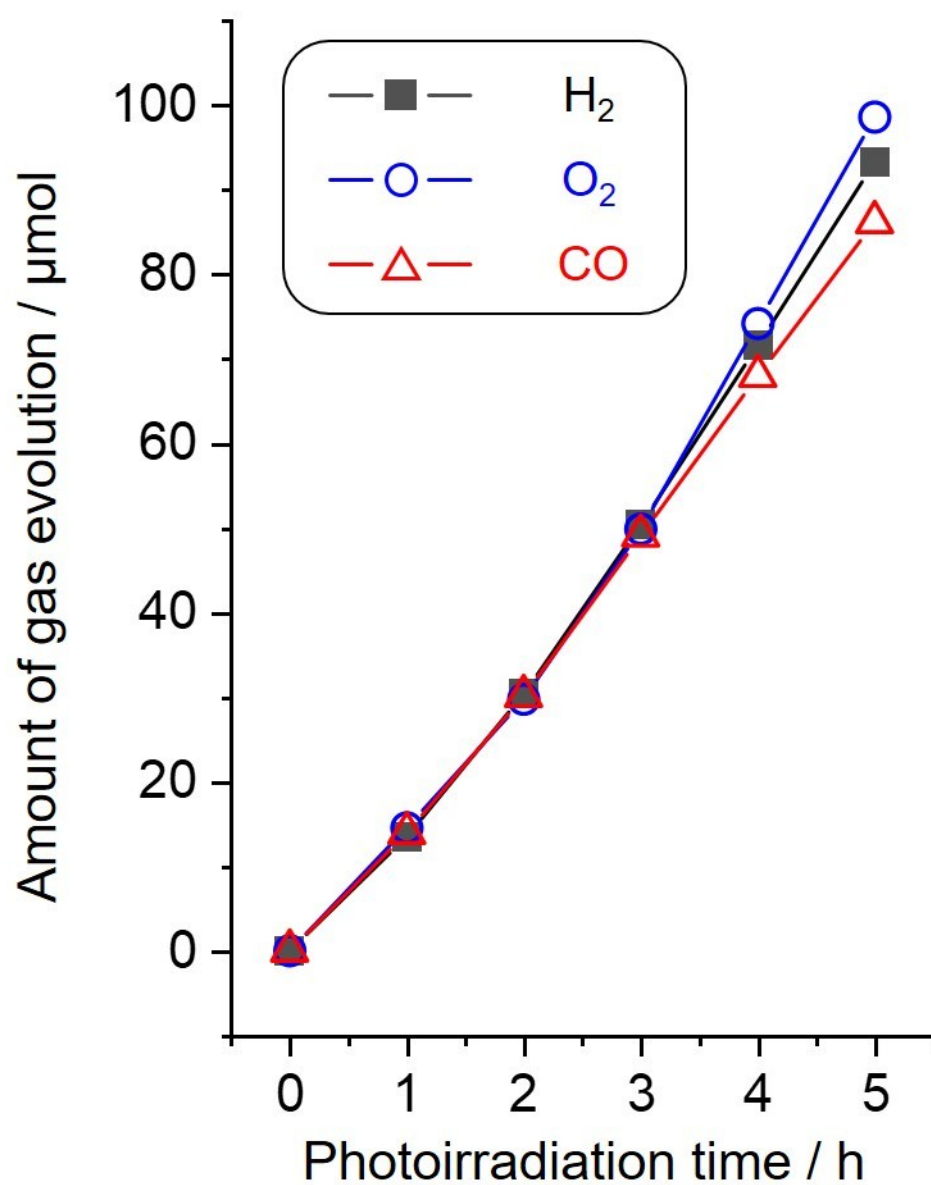

**Figure S7** Time course of gas evolutions for photocatalytic conversion of  $\text{CO}_2$  with  $\text{H}_2\text{O}$  over bare AMH-derived  $\text{ZnGa}_2\text{O}_4$ -700.

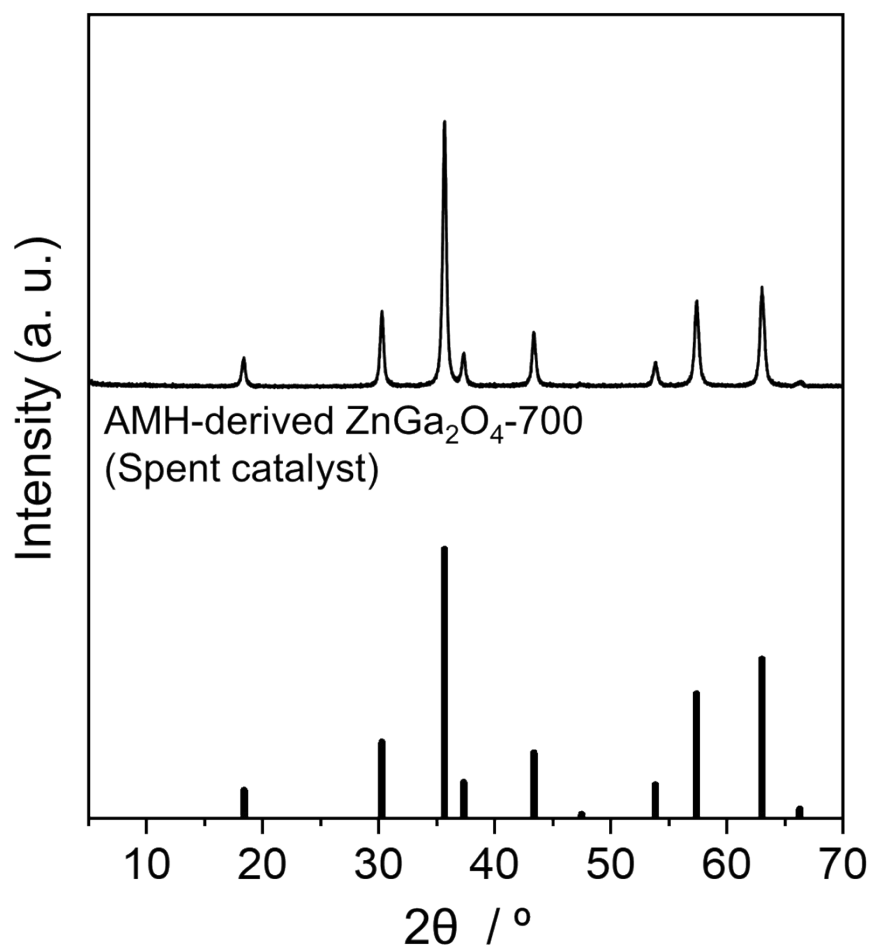

**Figure S8** PXRD pattern of AMH-derived ZnGa<sub>2</sub>O<sub>4</sub>-700 after the photocatalytic CO<sub>2</sub> reduction in water.

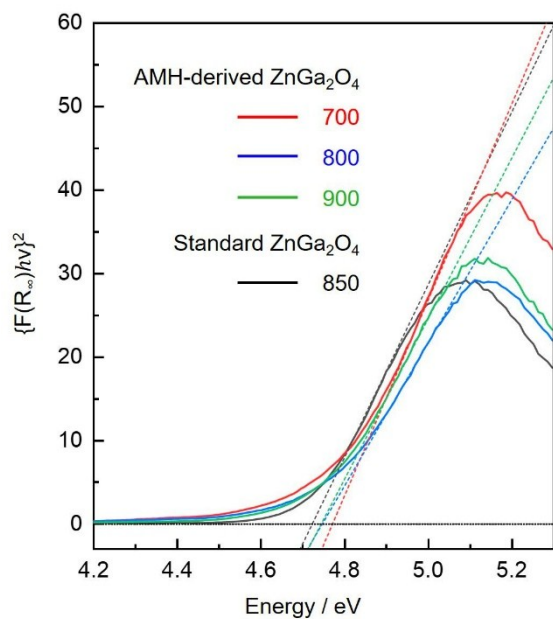

| catalyst                                 | Temperature<br>/ °C | $E_g$<br>/ eV |
|------------------------------------------|---------------------|---------------|
| AMH-derived<br>$\text{ZnGa}_2\text{O}_4$ | 700                 | 4.8           |
|                                          | 800                 | 4.7           |
|                                          | 900                 | 4.7           |
| Standard $\text{ZnGa}_2\text{O}_4$       | 850                 | 4.7           |

**Figure S9 UV-Vis spectra and estimated  $E_g$  values of  $\text{ZnGa}_2\text{O}_4$  catalysts (without Ag co-catalyst).** There can be seen no dependence of the optical absorption property of  $\text{ZnGa}_2\text{O}_4$  catalysts ( $E_g$ : 4.6 - 4.8 eV) on the resultant catalytic activities. Catalysts after photocatalytic reaction were collected and measured.

**Table S1 Base strength, crystallite size and specific surface area of bare AMH-derived  $\text{ZnGa}_2\text{O}_4$  and standard  $\text{ZnGa}_2\text{O}_4$ .**

| Photocatalyst                         | Precursor                            | Temperature [°C] | Crystallite size [nm] | Specific surface area [ $\text{m}^2 \text{g}^{-1}$ ] | Base strength    |
|---------------------------------------|--------------------------------------|------------------|-----------------------|------------------------------------------------------|------------------|
| AMH-derived $\text{ZnGa}_2\text{O}_4$ | Zn-Ga AMH                            | 500              | 6.9                   | 26                                                   | $15 < H_-$       |
|                                       |                                      | 600              | 13                    | 15                                                   | $15 < H_-$       |
|                                       |                                      | 700              | 20                    | 5.0                                                  | $9.8 < H_- < 15$ |
|                                       |                                      | 800              | 25                    | 4.7                                                  | $9.8 < H_- < 15$ |
|                                       |                                      | 900              | 39                    | 0.53                                                 | $9.8 < H_- < 15$ |
| Standard $\text{ZnGa}_2\text{O}_4$    | $\text{ZnO} + \text{Ga}_2\text{O}_3$ | 850              | 29                    | 1.3                                                  | $H_- < 7.2$      |

**Table S2 Summary of crystallite size, specific surface area and reaction selectivity toward CO evolution in photocatalytic conversion of  $\text{CO}_2$  with  $\text{H}_2\text{O}$  of bare  $\text{ZnGa}_2\text{O}_4$  catalysts.**

| Photocatalyst                         | Temperature [°C] | Crystallite size [nm] | Specific surface area [ $\text{m}^2 \text{g}^{-1}$ ] | Reaction selectivity toward CO evolution [%] |
|---------------------------------------|------------------|-----------------------|------------------------------------------------------|----------------------------------------------|
| AMH-derived $\text{ZnGa}_2\text{O}_4$ | 700              | 20                    | 5.0                                                  | 48.0                                         |
|                                       | 800              | 25                    | 4.7                                                  | 40.3                                         |
|                                       | 900              | 39                    | 0.53                                                 | 47.3                                         |
| Standard $\text{ZnGa}_2\text{O}_4$    | 850              | 29                    | 1.3                                                  | 20.3                                         |

## Reference

1. Z. Wang, K. Teramura, S. Hosokawa and T. Tanaka, *J. Mater. Chem. A*, 2015, **3**, 11313-11319.
2. N. Tarutani, Y. Tokudome, M. Jobbágy, F. A. Viva, G. J. A. A. Soler-Illia and T. Masahide, *Chem. Mater.*, 2016, **28**, 5606-5610.
3. J. S. Kim, J. S. Kim and H. L. Park, *Solid State Commun.*, 2004, **131**, 735-738.
4. Q. Shi, J. Zhang, C. Cai, L. Cong and T. Wang, *Mater. Sci. Eng.: B*, 2008, **149**, 82-86.
